# Supplementary material for: Biomineralization by Extremely Halophilic and Metal-Tolerant Community Members from a Sulfate-Dominated Metal-Rich Environment
Source: MDPI journal article supplement (doi:10.3390/microorganisms10010079), 2021-12-31
Supplement: s1 [file s1]

## Supplemental Material

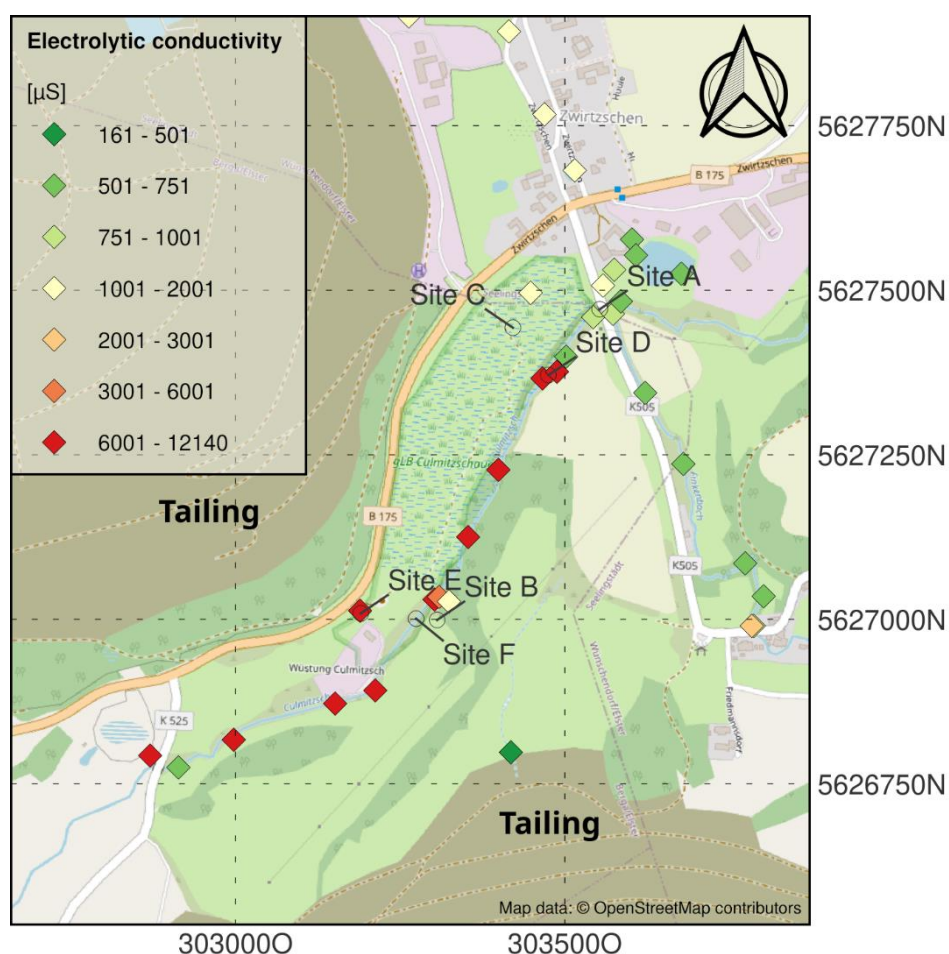

**Suppl. Figure S1.** Map of the sampling area with sites A (lowest influence) through F (highest contamination) along a salinity gradient resulting from seepage waters from two tailings located to the northwest and southeast.

**Suppl. Table S1.** Element concentrations in three independent samples were measured for soil or sediment samples.

| site                         | Cd          | Co          | Cu          | Fe           | Mn            | Ni          | Pb          | Sr           | Zn           | Cs          |
|------------------------------|-------------|-------------|-------------|--------------|---------------|-------------|-------------|--------------|--------------|-------------|
| soil/sediment samples (µg/g) |             |             |             |              |               |             |             |              |              |             |
| <b>A</b>                     | 0.17 ± 0.01 | 0.12 ± 0.01 | 0.96 ± 0.00 | 1.60 ± 0.10  | 484.40 ± 3.13 | 6.90 ± 0.14 | 0.02 ± 0.00 | 9.90 ± 0.07  | 32.34 ± 0.20 | 0.17 ± 0.00 |
|                              | 0.13 ± 0.01 | 0.43 ± 0.00 | 2.34 ± 0.11 | 3.42 ± 0.20  | 194.00 ± 1.22 | 1.12 ± 0.03 | 0.48 ± 0.01 | 8.81 ± 0.00  | 3.90 ± 0.03  | 0.28 ± 0.01 |
| <b>B</b>                     | 0.14 ± 0.01 | 0.44 ± 0.01 | 1.38 ± 0.02 | 2.31 ± 0.12  | 198.36 ± 0.30 | 1.30 ± 0.11 | 0.31 ± 0.00 | 7.03 ± 0.03  | 5.80 ± 0.22  | 0.11 ± 0.00 |
|                              | 0.14 ± 0.01 | 0.54 ± 0.01 | 1.37 ± 0.01 | 3.58 ± 0.20  | 257.00 ± 1.41 | 1.03 ± 0.03 | 0.40 ± 0.01 | 9.22 ± 0.01  | 3.60 ± 0.20  | 0.11 ± 0.00 |
| <b>C</b>                     | 0.43 ± 0.03 | 0.35 ± 0.01 | 0.66 ± 0.07 | 5.94 ± 0.20  | 31.20 ± 0.32  | 0.49 ± 0.07 | 1.31 ± 0.01 | 8.45 ± 0.10  | 2.80 ± 0.20  | 0.19 ± 0.00 |
|                              | 0.65 ± 0.01 | 0.29 ± 0.00 | 0.82 ± 0.04 | 11.00 ± 0.22 | 24.57 ± 0.22  | 0.64 ± 0.09 | 5.12 ± 0.04 | 13.81 ± 0.05 | 4.89 ± 0.20  | 0.24 ± 0.01 |
| <b>D</b>                     | 1.43 ± 0.08 | 0.37 ± 0.01 | 0.66 ± 0.03 | 16.36 ± 0.08 | 21.80 ± 0.14  | 0.71 ± 0.03 | 4.58 ± 0.01 | 13.67 ± 0.20 | 8.07 ± 0.13  | 0.52 ± 0.01 |
|                              | 0.19 ± 0.01 | 1.55 ± 0.03 | 3.46 ± 0.07 | 17.50 ± 0.10 | 210.20 ± 2.19 | 2.91 ± 0.06 | 1.17 ± 0.01 | 33.15 ± 0.07 | 22.59 ± 0.08 | 4.03 ± 0.00 |

|          |             |             |             |             |                |              |             |              |              |             |
|----------|-------------|-------------|-------------|-------------|----------------|--------------|-------------|--------------|--------------|-------------|
| <b>E</b> | 1.08 ± 0.07 | 0.62 ± 0.00 | 3.66 ± 0.07 | 1.80 ± 0.10 | 1595.00 ± 8.25 | 19.60 ± 0.10 | 0.28 ± 0.00 | 23.62 ± 0.10 | 33.05 ± 1.00 | 9.35 ± 0.08 |
|          | 0.97 ± 0.01 | 0.20 ± 0.00 | 4.58 ± 0.07 | 1.42 ± 0.07 | 698.00 ± 11.03 | 16.58 ± 0.70 | 0.16 ± 0.00 | 21.55 ± 0.03 | 40.27 ± 0.20 | 7.69 ± 0.05 |
|          | 0.96 ± 0.04 | 0.09 ± 0.00 | 3.61 ± 0.05 | 1.40 ± 0.20 | 669.00 ± 14.14 | 15.80 ± 0.32 | 0.09 ± 0.00 | 25.01 ± 0.03 | 44.50 ± 0.32 | 7.47 ± 0.05 |
| <b>F</b> | 0.08 ± 0.00 | 0.58 ± 0.02 | 1.32 ± 0.03 | 7.58 ± 0.10 | 56.00 ± 0.85   | 1.55 ± 0.05  | 0.72 ± 0.00 | 11.28 ± 0.04 | 6.85 ± 0.05  | 2.04 ± 0.03 |

water samples (µg/l)

|          |             |             |             |               |                |              |             |                 |              |              |
|----------|-------------|-------------|-------------|---------------|----------------|--------------|-------------|-----------------|--------------|--------------|
| <b>A</b> | < 0.1       | 0.49 ± 0.00 | 2.06 ± 0.01 | 40.00 ± 1.00  | 146.50 ± 0.00  | 3.40 ± 0.20  | < 0.05      | 248.00 ± 3.00   | 12.90 ± 0.70 | 0.32 ± 0.01  |
| <b>D</b> | < 0.4       | 0.92 ± 0.00 | < 1         | 30.00 ± 4.00  | 876.40 ± 0.40  | 4.80 ± 0.90  | < 0.1       | 1206.00 ± 5.00  | < 20         | 57.20 ± 0.70 |
| <b>E</b> | 0.20 ± 0.03 | 1.08 ± 0.01 | 2.90 ± 0.20 | 118.00 ± 1.00 | 2395.00 ± 3.00 | 8.80 ± 0.70  | 0.10 ± 0.00 | 414.60 ± 0.10   | 65.00 ± 2.00 | 17.80 ± 0.20 |
| <b>F</b> | 0.53 ± 0.07 | 1.50 ± 0.10 | < 1         | 25.00 ± 4.00  | 925.00 ± 3.00  | 22.00 ± 2.00 | < 0.1       | 1210.00 ± 10.00 | < 20         | 56.10 ± 0.20 |

|          | Ba           | Ca            | K            | Mg            | Na              | fluoride    | chloride       | sulfate         |
|----------|--------------|---------------|--------------|---------------|-----------------|-------------|----------------|-----------------|
| <b>A</b> | 0.04 ± 0.001 | 66.00 ± 0.30  | 15.60 ± 0.20 | 22.30 ± 0.30  | 65.00 ± 1.00    | 0.26 ± 0.01 | 87.80 ± 0.30   | 134.90 ± 0.50   |
| <b>D</b> | 0.06 ± 0.001 | 333.00 ± 2.00 | 33.50 ± 0.30 | 729.00 ± 4.00 | 1504.00 ± 9.00  | 1.81 ± 0.01 | 1037.00 ± 5.00 | 5535.00 ± 27.00 |
| <b>E</b> | 0.11 ± 0.001 | 115.29 ± 0.02 | 13.20 ± 0.10 | 126.90 ± 0.90 | 669.00 ± 3.00   | 1.03 ± 0.01 | 780.00 ± 1.00  | 781.00 ± 10.00  |
| <b>F</b> | 0.05 ± 0.001 | 334.40 ± 0.40 | 33.70 ± 0.30 | 733.00 ± 6.00 | 1517.00 ± 22.00 | 1.80 ± 0.01 | 1027.00 ± 4.00 | 5472.00 ± 20.00 |

For description of sampling sites and information on multiple sampling times, see Material and Methods; additional ions were measured in the water samples to determine water chemistry (mg/l).

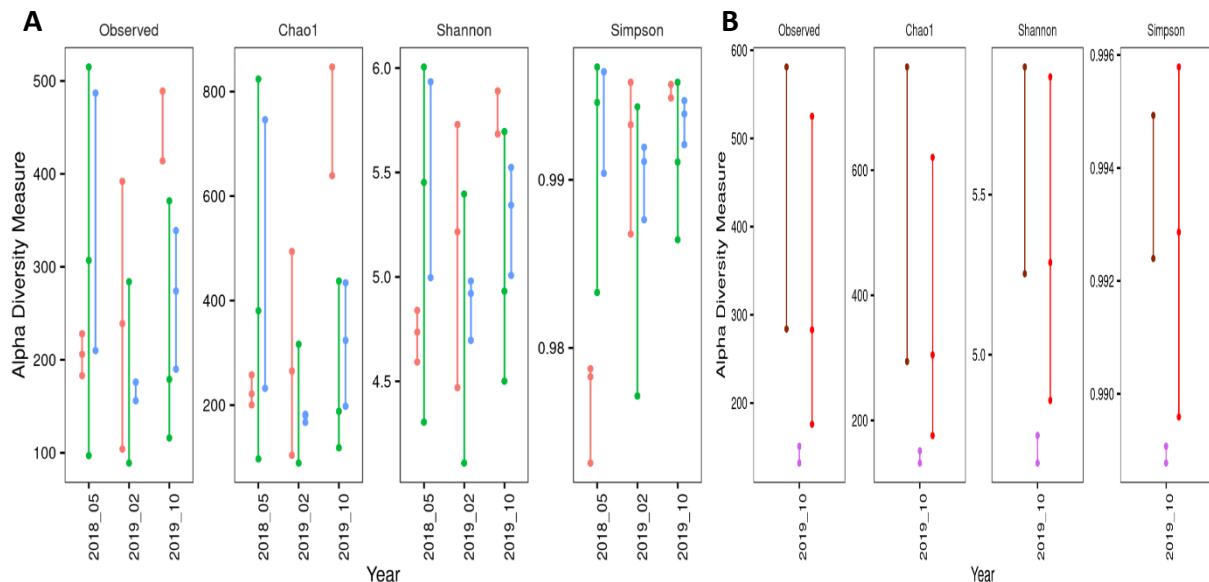

**Suppl. Figure S2.** Alpha-diversity measurements of the indices Chao1 as estimator for richness, Shannon for diversity and Simpson for dominance in bacterial microbiomes to compare sampling points over time. The analyses were carried out with the rarefied 16S rRNA sequences of bacterial microbiomes for soil (A) and sediment (B) samples. Red, site E; green, site B; blue, site C; brown, site F; purple, site A; light red, site D.

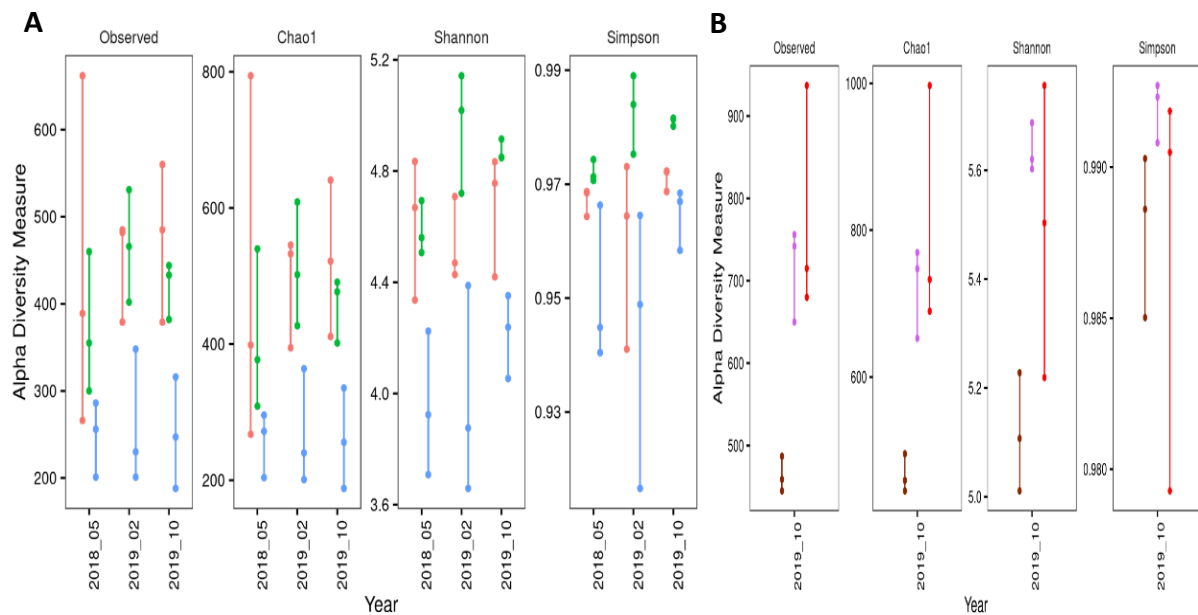

**Suppl. Figure S3.** Alpha-diversity measurements of the indices Chao1 as estimator for richness, Shannon for diversity and Simpson for dominance in fungal microbiomes to compare sampling points over time. The analyses were carried out with the rarefied ITS microbiomes for soil (A) and sediment (B) samples. Red, site E; green, site B; blue, site C; brown, site F; purple, site A; light red, site D.

**Suppl. Table S2. Microbial count** of microbes in soil/sediment (cfu/g) and water (cfu/ml) samples.

| samples |          | isolation medium           | cfu/g or cfu/ml    |
|---------|----------|----------------------------|--------------------|
| site A  | sediment | Std I + 10% NaCl           | $6.76 \times 10^4$ |
|         |          | R2A + 10% NaCl             | $7.81 \times 10^4$ |
|         | water    | R2A + 10% NaCl             | $2.78 \times 10^3$ |
| site B  | soil     | Std I                      | $3.02 \times 10^7$ |
|         |          | soil extract               | $9.37 \times 10^6$ |
|         |          | Std I + 10% NaCl           | $5.89 \times 10^4$ |
|         |          | Std I + 20% NaCl           | 0                  |
|         |          | MEA                        | $7.66 \times 10^5$ |
| site c  | soil     | Std I                      | $1.18 \times 10^7$ |
|         |          | soil extract               | $1.00 \times 10^7$ |
|         |          | Std I + 10% NaCl           | $1.05 \times 10^5$ |
|         |          | Std I + 20% NaCl           | $6.67 \times 10^2$ |
|         |          | MEA                        | $1.44 \times 10^6$ |
| site D  | sediment | Std I + 10% NaCl           | $7.41 \times 10^4$ |
|         |          | R2A + 10% NaCl             | $4.44 \times 10^4$ |
|         | water    | R2A + 10% NaCl             | $2.81 \times 10^4$ |
| site E  | soil     | Std I                      | $7.28 \times 10^6$ |
|         |          | soil extract               | $7.45 \times 10^6$ |
|         |          | Std I + 10% NaCl (10/2019) | $2.47 \times 10^5$ |
|         |          | Std I + 20% NaCl           | $3.33 \times 10^2$ |
|         |          | MEA                        | $5.00 \times 10^4$ |
| site F  | sediment | Std I + 10% NaCl           | $2.89 \times 10^5$ |
|         |          | R2A + 10% NaCl             | $2.00 \times 10^5$ |
|         | water    | R2A + 10% NaCl             | $1.67 \times 10^3$ |

**Suppl. Table S3.** Salt tolerance of isolates grown on NaCl or Na<sub>2</sub>SO<sub>4</sub> containing media.

|                                 |       | Number of isolates | Percentage* |
|---------------------------------|-------|--------------------|-------------|
| NaCl                            | 10%   | 101                | 74          |
|                                 | 20%   | 38                 | 28          |
|                                 | 30%   | 43                 | 32          |
| Na <sub>2</sub> SO <sub>4</sub> | 10%   | 116                | 85          |
|                                 | 14%   | 107                | 79          |
|                                 | 17%   | 93                 | 68          |
|                                 | Std I | 129                | 95          |

\* Percentage of strains growing with salt addition of 136 tested.

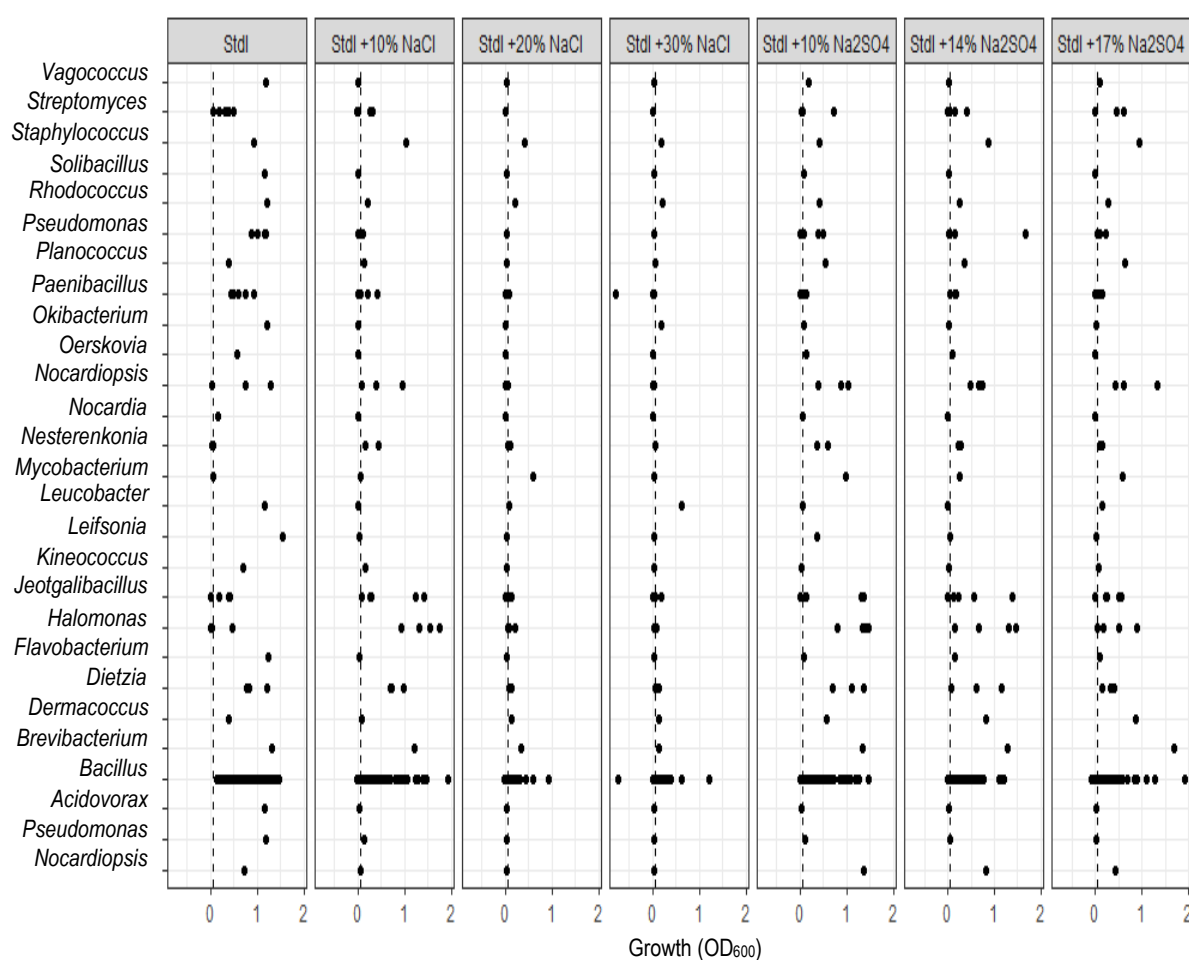

**Suppl. Figure S4.** Distribution of salt tolerance for genera isolated as per growth in salt-rich media. Each dot represents one isolate with the maximum tolerated salt for growth.

**Suppl. Table S4.** Minerals formed on different salt containing media and mineral micromorphology per isolate.

| isolate |                             | Cs <sub>2</sub> SO <sub>4</sub> | CsCl                 | SrCl <sub>2</sub>       |
|---------|-----------------------------|---------------------------------|----------------------|-------------------------|
| 5       | <i>Bacillus</i> sp.         | tetrahedon                      | tetrahedon           | -                       |
| 9       | <i>Bacillus</i> sp.         | tetrahedon                      | skin                 | -                       |
| 10      | <i>Bacillus</i> sp.         | skin                            | tetrahedon           | singletons              |
| 13      | <i>Bacillus</i> sp.         | tetrahedon / needles            | tetrahedon           | singletons              |
| 16      | <i>Bacillus</i> sp.         | tetrahedon                      | tetrahedon           | singletons              |
| 21      | <i>Bacillus</i> sp.         | tetrahedon                      | tetrahedon           | singletons              |
| 24      | <i>Bacillus</i> sp.         | tetrahedon                      | tetrahedon           | singletons              |
| 44      | <i>Bacillus</i> sp.         | tetrahedon                      | tetrahedon           | singletons              |
| 49      | <i>Bacillus</i> sp.         | tetrahedon                      | tetrahedon           | few singletons          |
| 51      | <i>Bacillus</i> sp.         | tetrahedon                      | tetrahedon           | singletons              |
| 53B     | <i>Bacillus</i> sp.         | tetrahedon                      | tetrahedon           | singletons              |
| 72      | <i>Bacillus</i> sp.         | tetrahedon                      | tetrahedon           | -                       |
| 78      | <i>Bacillus</i> sp.         | tetrahedon                      | tetrahedon / needles | singletons              |
| 79      | <i>Bacillus</i> sp.         | tetrahedon                      | tetrahedon           | -                       |
| 80.1    | <i>Bacillus</i> sp.         | tetrahedon                      | needles              | singletons              |
| 85      | <i>Bacillus</i> sp.         | tetrahedon                      | tetrahedon           | -                       |
| 101     | <i>Bacillus</i> sp.         | tetrahedon                      | tetrahedon           | -                       |
| 106     | <i>Leucobacter</i> sp.      | tetrahedon                      | tetrahedon           | singletons              |
| 107     | <i>Bacillus</i> sp.         | tetrahedon / needles            | tetrahedon           | singletons              |
| 130     | <i>Bacillus</i> sp.         | tetrahedon                      | tetrahedon           | singletons              |
| A3      | <i>Bacillus</i> sp.         | tetrahedon                      | tetrahedon           | aggregates              |
| A16     | <i>Jeotgalibacillus</i> sp. | needles                         | needles              | singletons              |
| A26     | <i>Halomonas</i> sp.        | tetrahedon                      | tetrahedon           | singletons              |
| A28     | <i>Bacillus</i> sp.         | needles                         | needles              | aggregates              |
| A50     | <i>Jeotgalibacillus</i> sp. | needles                         | needles              | singletons              |
| B15     | <i>Bacillus</i> sp.         | tetrahedon                      | tetrahedon           | singletons              |
| B16     | <i>Rhodococcus</i> sp.      | needles                         | needle aggregates    | singletons              |
| B48     | <i>Staphylococcus</i> sp.   | tetrahedon                      | tetrahedon           | aggregates              |
| B54     | <i>Brevibacterium</i> sp.   | tetrahedon                      | tetrahedon           | singletons + aggregates |
| B59     | <i>Dietzia</i> sp.          | tetrahedon                      | tetrahedon           | singletons              |
| B61     | <i>Planococcus</i> sp.      | tetrahedon                      | tetrahedon           | singletons              |
| B75     | <i>Dermacoccus</i> sp.      | tetrahedon                      | tetrahedon           | singletons              |
| B76     | <i>Mycobacterium</i> sp.    | tetrahedon                      | tetrahedon           | singletons              |

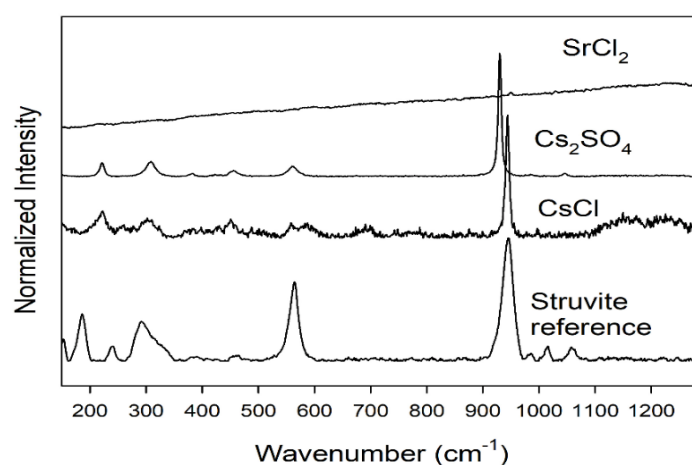

**Suppl. Figure S5.** Raman spectra of crystals that precipitated in experiments with CsCl, Cs<sub>2</sub>SO<sub>4</sub>, and SrCl<sub>2</sub> solutions in comparison to a reference spectrum of struvite (RRUFF ID: R050540). The spectrum of the SrCl<sub>2</sub>-rich sample displays a faint peak at ca. 950 cm<sup>-1</sup>, which

can be assigned to a phosphate group. The spectra of Cs-rich crystals are in good agreement with the reference spectrum of struvite.

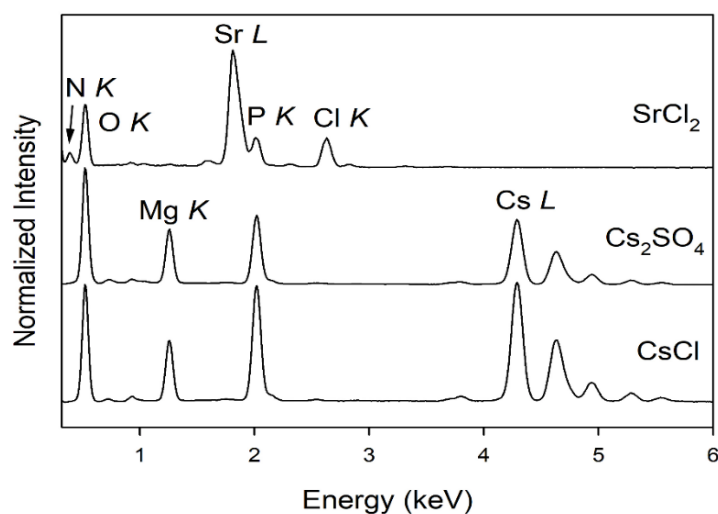

**Suppl. Figure S6.** Energy-dispersive X-ray (EDX) emission spectra of crystals that precipitated in experiments with CsCl,  $\text{Cs}_2\text{SO}_4$ , and  $\text{SrCl}_2$  solutions. Main elements in the Cs-rich crystals are O, Mg, and P, indicating a struvite composition in which the Cs replaces the monovalent Ammonium group. The Sr-rich crystals seem to represent an assemblage of two phases:  $\text{SrCl}_2$  and Sr-rich struvite, the latter containing N.
